# Supplementary material for: Changes in Cecal Microbiota and Short-chain Fatty Acid During Lifespan of the Rat
Source: PubMed Central journal article supplement — J Neurogastroenterol Motil. 2021 Jan 30;27(1):134–46. doi: 10.5056/jnm20148 (PMC7786083; doi:10.5056/jnm20148), 2021-01-30
Supplement: jnm-27-1-134-supple.pdf [file jnm-27-1-134-supple.pdf]

**Supplementary Table.** The Sequence of Primers Used for Real-time Quantitative Polymerase Chain Reaction

| Gene          |         | 5'→3' sequence             |
|---------------|---------|----------------------------|
| COX-2         | Forward | tgc aga gtt gaa agc cct ct |
|               | Reverse | ccc caa aga tag cat ctg ga |
| iNOS          | Forward | ggg agc cag agc agt aca ag |
|               | Reverse | cat ggt gaa cac gtt ctt gg |
| TNF- $\alpha$ | Forward | tgc ctc agc ctc ttc tca tt |
|               | Reverse | ccc att tgg gaa ctt ctc ct |
| Caudin-2      | Forward | agg tgc tga ggg tag aa     |
|               | Reverse | aat agc aaa aag tgg cag ca |

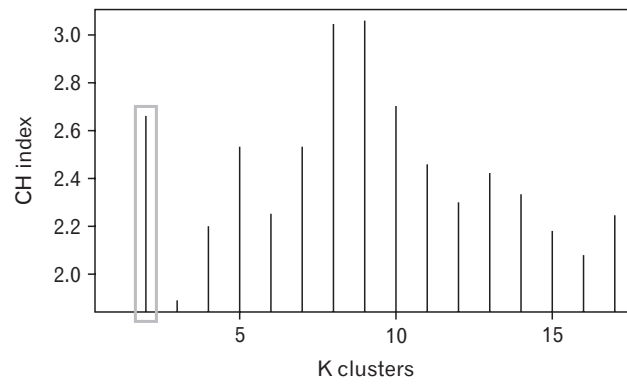

**Supplementary Figure.** The optimal cluster number for maximizing the Calinski-Harabasz (CH) index value.
